# Supplementary material for: Influence of moiety sequence on the performance of small molecular photovoltaic materials
Source: Royal Society of Chemistry journal article supplement (doi:10.1039/c4ta03125c), 2014-01-01
Supplement: c4ta03125c1.pdf [file c4ta03125c1.pdf]

## Electronic Supplementary Information

### Influence of moiety sequence on the performance of small molecular photovoltaic materials

Long Liang,<sup>a</sup> Jin-Tu Wang,<sup>a</sup> Xuan Xiang,<sup>b</sup> Jun Ling,<sup>c</sup> Fu-Gang Zhao<sup>b</sup> and Wei-Shi Li<sup>\*ab</sup>

<sup>a</sup> Laboratory of Synthetic and Self-assembly Chemistry for Organic Functional Molecules, Shanghai Institute of Organic Chemistry, Chinese Academy of Sciences, 345 Lingling road, Shanghai 200032, China.

<sup>b</sup> Department of Chemistry, Zhejiang Sci-Tech University, Hangzhou 310018, China.

<sup>c</sup> Department of Polymer Science and Engineering, Zhejiang University, Hangzhou 310027, China.

#### Contents:

- Table S1** Device optimization for the OSCs based on **BDT(ThBTTh)<sub>2</sub>** and **BDT(BTTh)<sub>2</sub>**.
- Fig. S1** TGA curves of **BDT(ThBTTh)<sub>2</sub>** and **BDT(BTTh)<sub>2</sub>**
- Fig. S2** The second heating and cooling DSC curves of **BDT(ThBTTh)<sub>2</sub>** and **BDT(BTTh)<sub>2</sub>**.
- Fig. S3** Cyclic voltammograms of **BDT(ThBTTh)<sub>2</sub>** and **BDT(BTTh)<sub>2</sub>** films
- Fig. S4** The OFET transfer curves of (a) **BDT(ThBTTh)<sub>2</sub>** and (b) **BDT(BTTh)<sub>2</sub>** measured with a device structure of Si/SiO<sub>2</sub>/OTS/active layer/Au.
- Fig. S5** The SCLC fitting curves of **BDT(ThBTTh)<sub>2</sub>** and **BDT(BTTh)<sub>2</sub>** measured with a device structure of ITO/PEDTO:PSS/active layer/Au.
- Fig. S6** <sup>1</sup>H NMR spectrum of compound **1**.
- Fig. S7** <sup>13</sup>C NMR spectrum of compound **1**.
- Fig. S8** <sup>1</sup>H NMR spectrum of compound **2**.
- Fig. S9** <sup>13</sup>C NMR spectrum of compound **2**.
- Fig. S10** <sup>1</sup>H NMR spectrum of compound **3**.
- Fig. S11** <sup>13</sup>C NMR spectrum of compound **3**.
- Fig. S12** <sup>1</sup>H NMR spectrum of compound **BDT(ThBTTh)<sub>2</sub>**.
- Fig. S13** MALDI-TOF mass spectrum of **BDT(ThBTTh)<sub>2</sub>**.
- Fig. S14** <sup>1</sup>H NMR spectrum of compound **4**.
- Fig. S15** <sup>1</sup>H NMR spectrum of compound **5**.
- Fig. S16** <sup>13</sup>C NMR spectrum of compound **5**.
- Fig. S17** <sup>1</sup>H NMR spectrum of compound **BDT(BTTh)<sub>2</sub>**.
- Fig. S18** MALDI-TOF mass spectrum of compound **BDT(BTTh)<sub>2</sub>**.

**Table S1** Device optimization for the OSCs based on **BDT(ThBTTh)<sub>2</sub>** and **BDT(BTTh<sub>2</sub>)<sub>2</sub>**<sup>a</sup>

| Compound                                 | Weight Ratio to PC <sub>61</sub> BM | C <sub>total</sub> (mg mL <sup>-1</sup> ) | Additive <sup>b</sup> (amount)  | T <sub>annealing</sub> (°C) | V <sub>OC</sub> (V) | J <sub>SC</sub> (mA cm <sup>-2</sup> ) | FF (%)      | PCE (%)     |
|------------------------------------------|-------------------------------------|-------------------------------------------|---------------------------------|-----------------------------|---------------------|----------------------------------------|-------------|-------------|
| <b>BDT(ThBTTh)<sub>2</sub></b>           | 3:1                                 | 30                                        | -                               | 120                         | 0.90                | 5.97                                   | 53.7        | 2.88        |
|                                          | 1.5:1                               | 30                                        | -                               | 120                         | 0.91                | 7.94                                   | 56.8        | 4.10        |
|                                          | 1:1                                 | 30                                        | -                               | 100                         | 0.86                | 7.57                                   | 64.1        | 4.19        |
|                                          | <b>1:1</b>                          | <b>30</b>                                 | -                               | <b>120</b>                  | <b>0.89</b>         | <b>9.33</b>                            | <b>54.5</b> | <b>4.53</b> |
|                                          | 1:1                                 | 40                                        | -                               | 120                         | 0.86                | 9.07                                   | 54.7        | 4.28        |
|                                          | 1:1                                 | 30                                        | -                               | 140                         | 0.87                | 3.85                                   | 45.9        | 1.53        |
|                                          | 1:2                                 | 30                                        | -                               | 120                         | 0.90                | 4.92                                   | 60.0        | 2.65        |
|                                          | 1:3                                 | 30                                        | -                               | 120                         | 0.87                | 2.24                                   | 65.2        | 1.27        |
|                                          | 1:1                                 | 30                                        | DIO (0.25% in v/v)              | 120                         | 0.84                | 6.30                                   | 42.4        | 2.25        |
|                                          | 1:1                                 | 30                                        | DIO (0.5% in v/v)               | 120                         | 0.21                | 3.77                                   | 26.1        | 0.21        |
|                                          | 1:1                                 | 30                                        | PDMS (0.2 mg mL <sup>-1</sup> ) | 120                         | 0.88                | 8.57                                   | 55.7        | 4.19        |
| <b>BDT(BTTh<sub>2</sub>)<sub>2</sub></b> | 3:1                                 | 30                                        | -                               | 120                         | 0.53                | 3.36                                   | 36.7        | 0.65        |
|                                          | 1.5:1                               | 30                                        | -                               | 120                         | 0.76                | 3.19                                   | 38.6        | 0.93        |
|                                          | 1:1                                 | 30                                        | -                               | 80                          | 0.74                | 1.96                                   | 38.0        | 0.55        |
|                                          | 1:1                                 | 30                                        | -                               | 100                         | 0.74                | 4.59                                   | 36.7        | 1.25        |
|                                          | 1:1                                 | 20                                        | -                               | 120                         | 0.63                | 4.52                                   | 35.8        | 1.02        |
|                                          | <b>1:1</b>                          | <b>30</b>                                 | -                               | <b>120</b>                  | <b>0.82</b>         | <b>4.74</b>                            | <b>40.5</b> | <b>1.58</b> |
|                                          | 1:1                                 | 40                                        | -                               | 120                         | 0.76                | 3.73                                   | 37.9        | 1.08        |
|                                          | 1:1                                 | 30                                        | -                               | 140                         | 0.53                | 2.73                                   | 28.8        | 0.42        |
|                                          | 1:2                                 | 30                                        | -                               | 120                         | 0.62                | 2.81                                   | 33.7        | 0.59        |
|                                          | 1:3                                 | 30                                        | -                               | 120                         | 0.54                | 1.08                                   | 33.2        | 0.19        |
|                                          | 1:1                                 | 30                                        | DIO (0.25% in v/v)              | 120                         | 0.51                | 3.45                                   | 33.2        | 0.59        |
|                                          | 1:1                                 | 30                                        | DIO (0.5% in v/v)               | 120                         | 0.33                | 0.75                                   | 28.5        | 0.07        |
|                                          | 1:1                                 | 30                                        | PDMS (0.2 mg mL <sup>-1</sup> ) | 120                         | 0.74                | 4.13                                   | 40.9        | 1.26        |

<sup>a</sup> Other conditions: annealing for 10 min, spin coated at 1000 rpm for 30 s

<sup>b</sup> DIO: 1,8-diiodoctane, PDMS: polydimethylsiloxane.

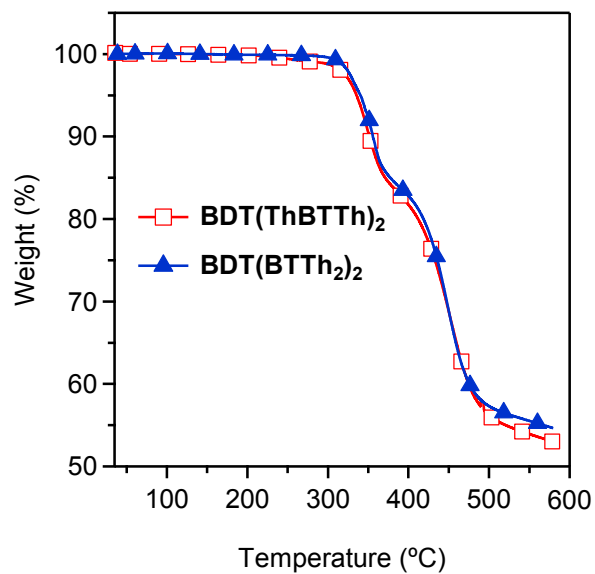

**Fig. S1** TGA curves of **BDT(ThBTTh)<sub>2</sub>** and **BDT(BTTh<sub>2</sub>)<sub>2</sub>**, at a heating rate of 10 °C min<sup>-1</sup> under N<sub>2</sub>.

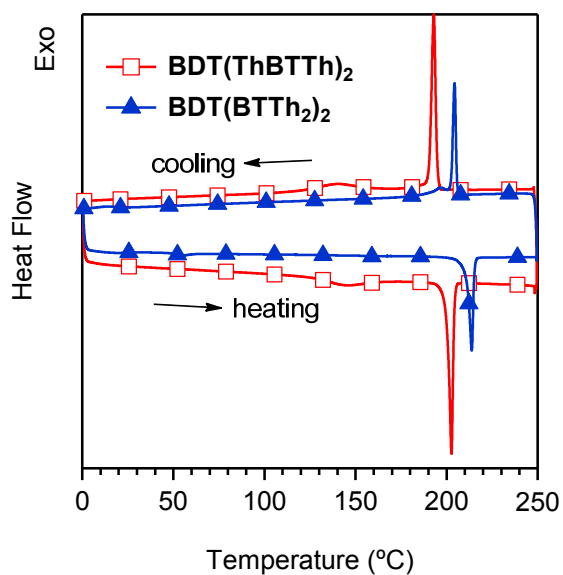

**Fig. S2** The second heating and cooling DSC curves of **BDT(ThBTTh)<sub>2</sub>** and **BDT(BTTh<sub>2</sub>)<sub>2</sub>**, at a heating and cooling rate of 10 °C min<sup>-1</sup> under N<sub>2</sub>.

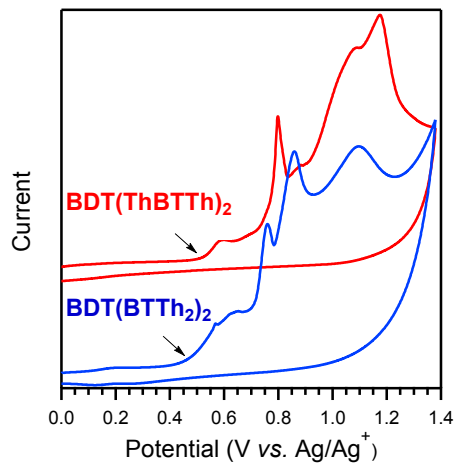

**Fig. S3** Cyclic voltammograms of **BDT(ThBTTh)<sub>2</sub>** and **BDT(BTTh<sub>2</sub>)<sub>2</sub>** films. The film samples were casted from chlorobenzene solutions onto glassy carbon electrodes and measured in CH<sub>3</sub>CN containing 0.1 M Bu<sub>4</sub>NPF<sub>6</sub> at a scan rate of 50 mV s<sup>-1</sup>.

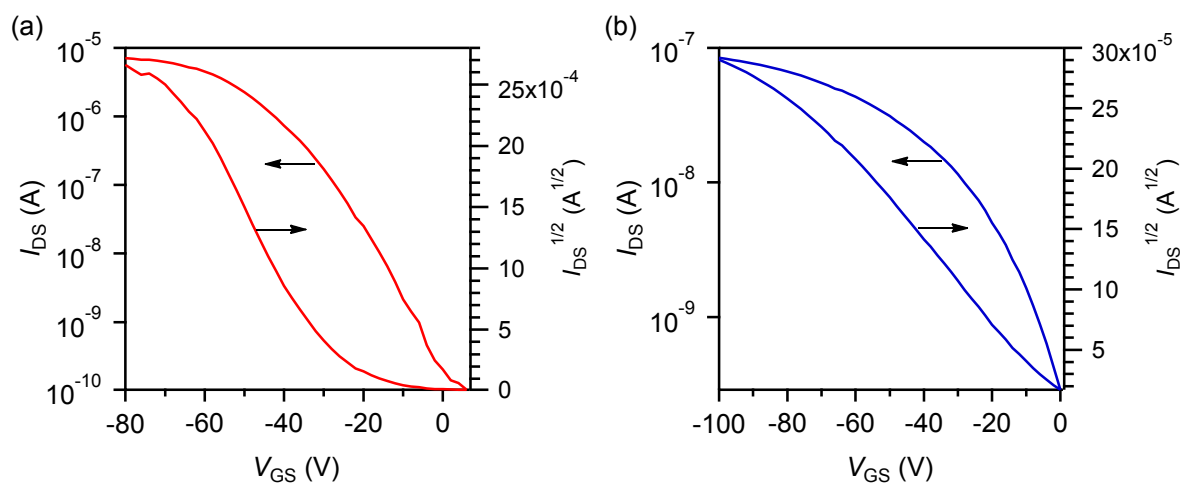

**Fig. S4** The OFET transfer curves of (a) **BDT(ThBTTh)<sub>2</sub>** and (b) **BDT(BTTh<sub>2</sub>)<sub>2</sub>** measured with a device structure of Si/SiO<sub>2</sub>/OTS/active layer/Au.

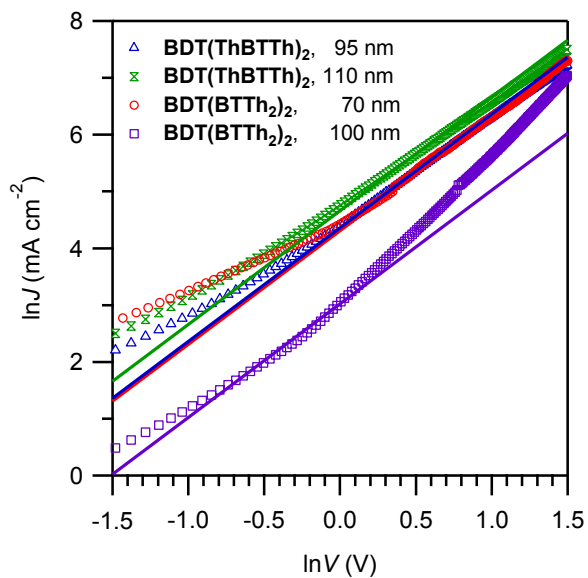

**Fig. S5**  $\ln J$ - $\ln V$  and their SCLC fitting curves of **BDT(ThBTTh)<sub>2</sub>** and **BDT(BTTh<sub>2</sub>)<sub>2</sub>** blend films with PC<sub>61</sub>BM (1/1, w/w) under different thicknesses.

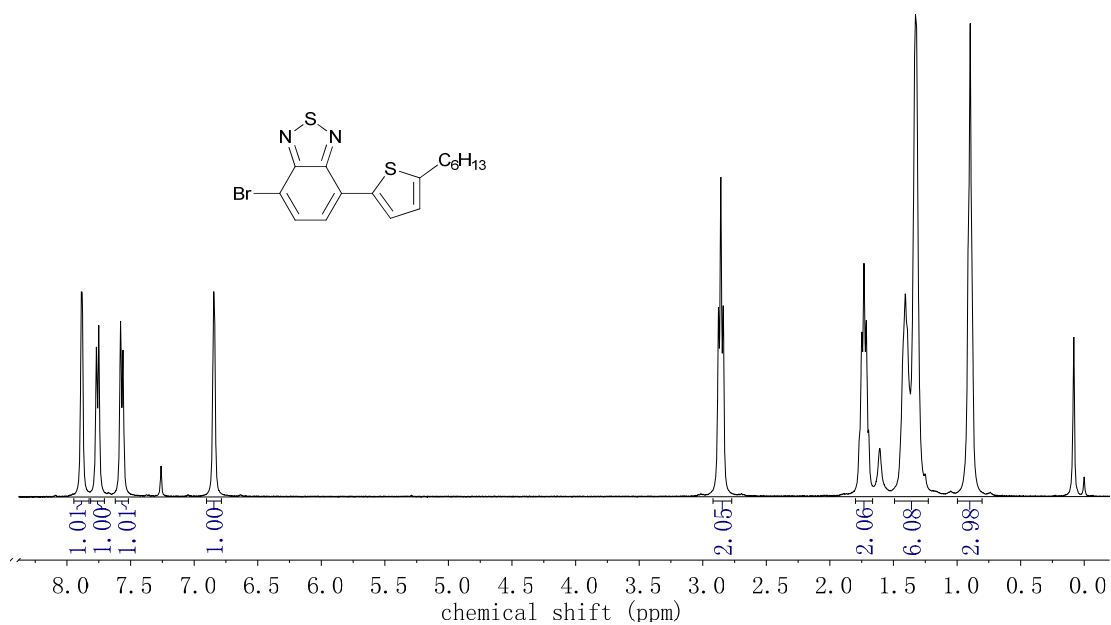

**Fig. S6** <sup>1</sup>H NMR spectrum of compound **1** in CDCl<sub>3</sub> at room temperature.

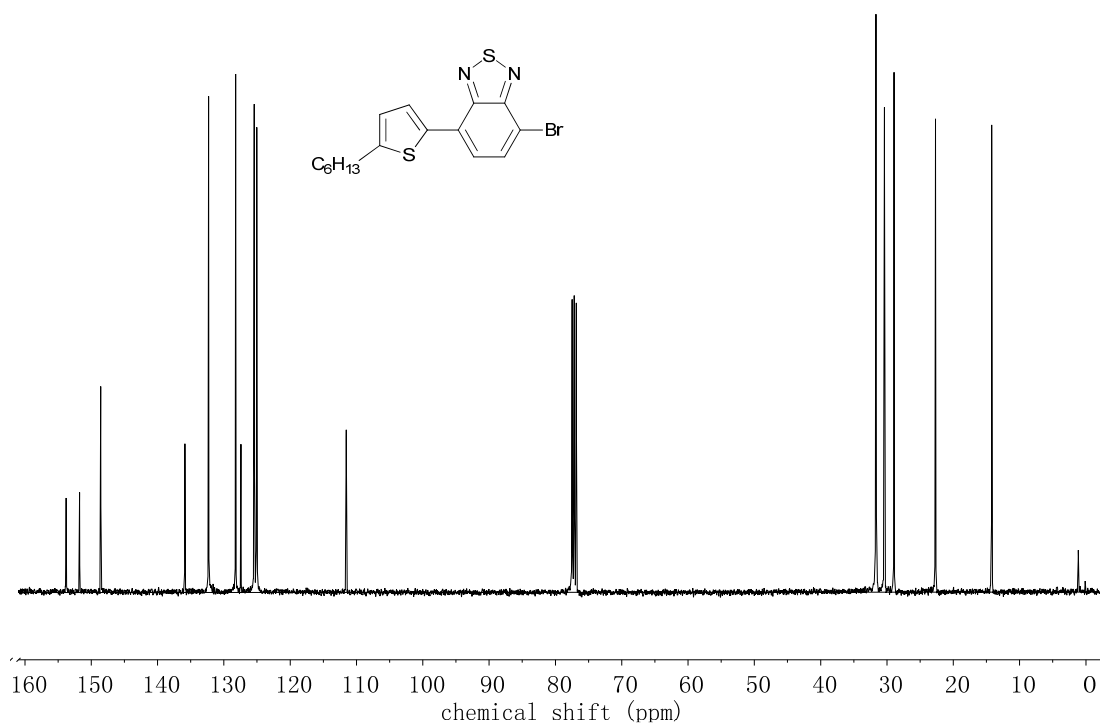

**Fig. S7**  $^{13}\text{C}$  NMR spectrum of compound **1** in  $\text{CDCl}_3$  at room temperature.

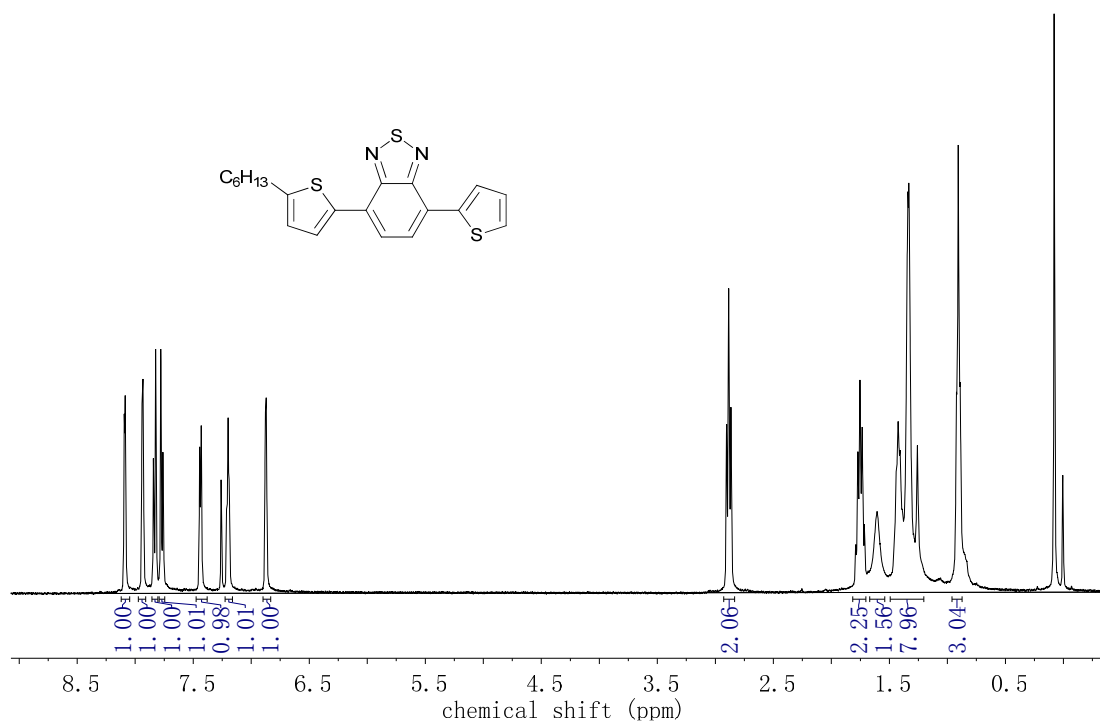

**Fig. S8**  $^1\text{H}$  NMR spectrum of compound **2** in  $\text{CDCl}_3$  at room temperature.

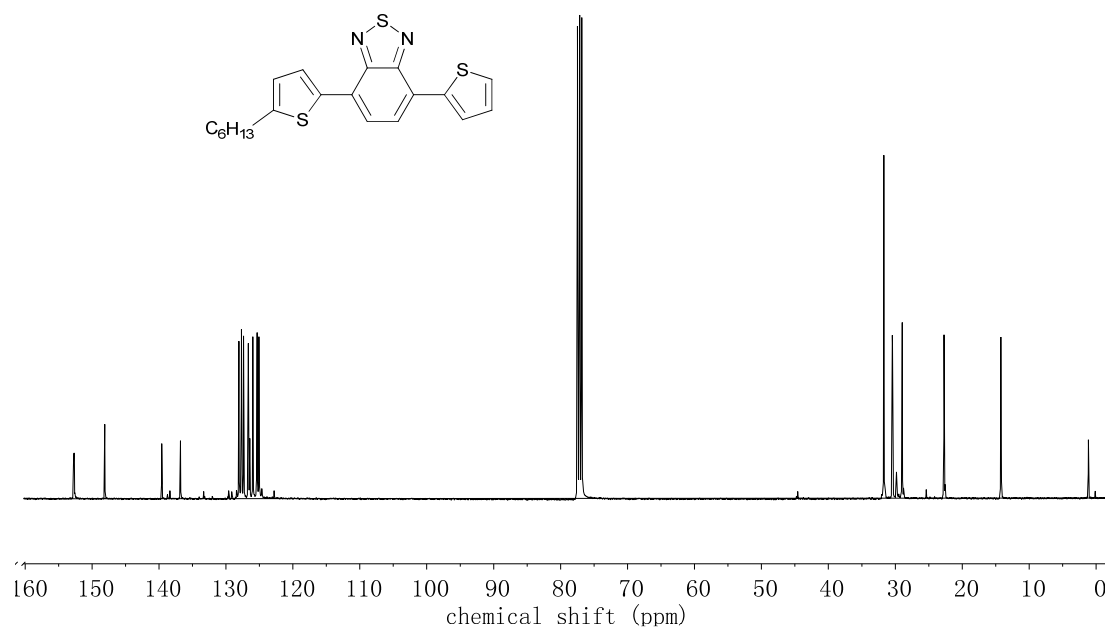

**Fig. S9**  $^{13}\text{C}$  NMR spectrum of compound **2** in  $\text{CDCl}_3$  at room temperature.

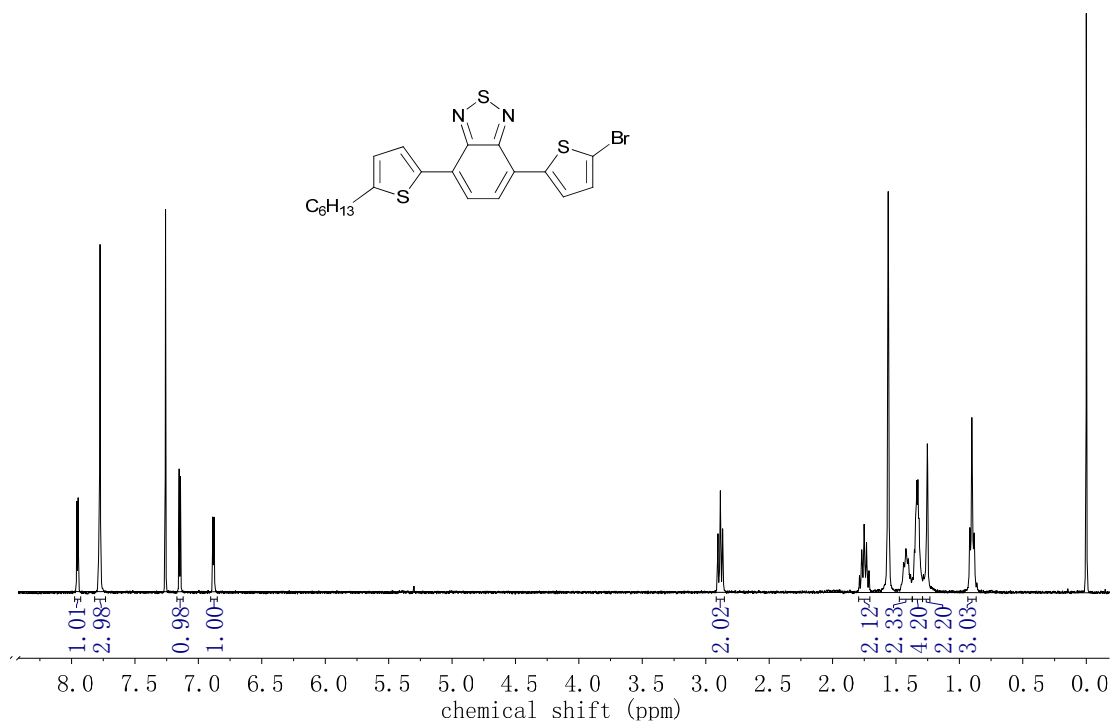

**Fig. S10**  $^1\text{H}$  NMR spectrum of compound **3** in  $\text{CDCl}_3$  at room temperature.

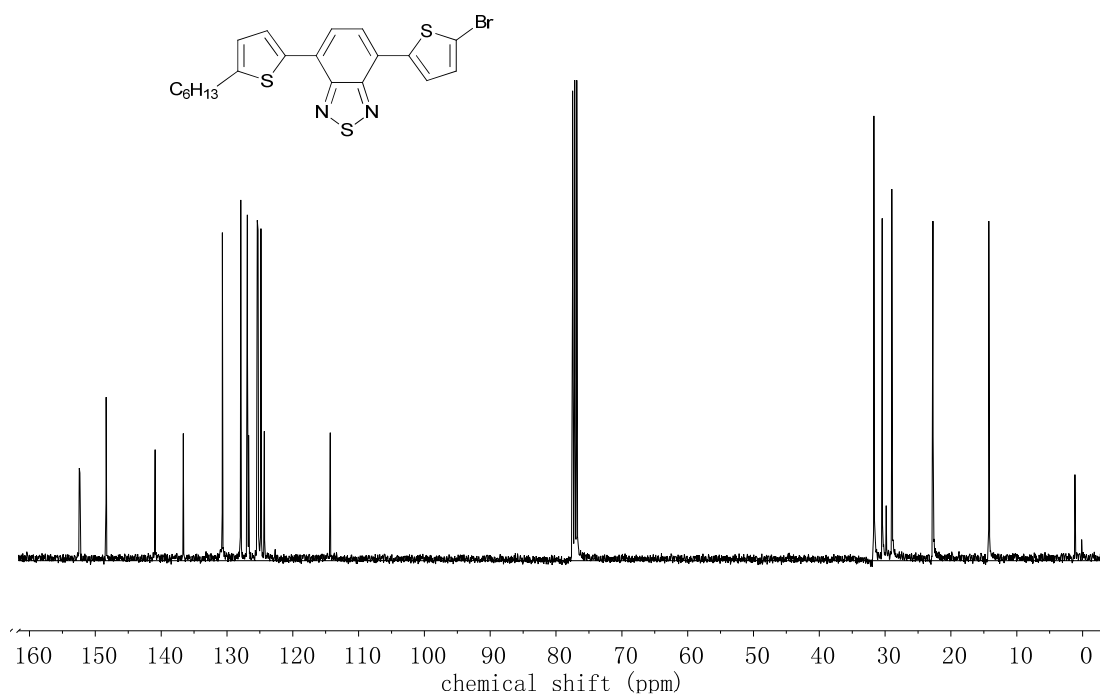

**Fig. S11**  $^{13}\text{C}$  NMR spectrum of compound **3** in  $\text{CDCl}_3$  at room temperature.

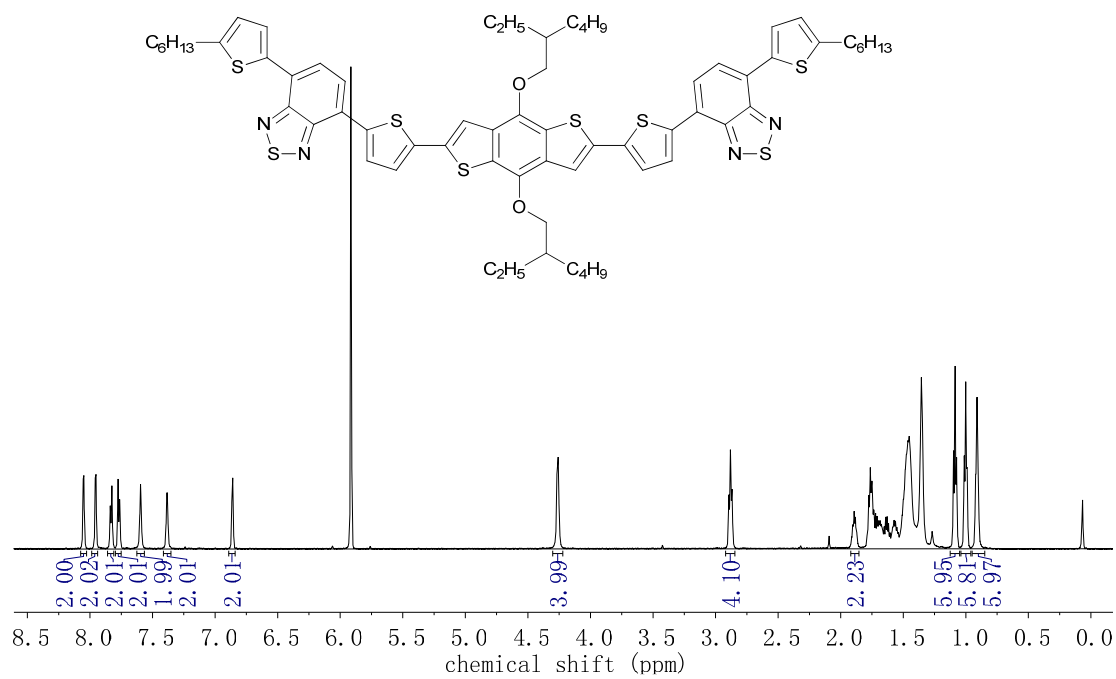

**Fig. S12**  $^1\text{H}$  NMR spectrum of **BDT(ThBTTh)<sub>2</sub>** in  $\text{CD}_2\text{Cl}_4$  at  $110\text{ }^\circ\text{C}$ .



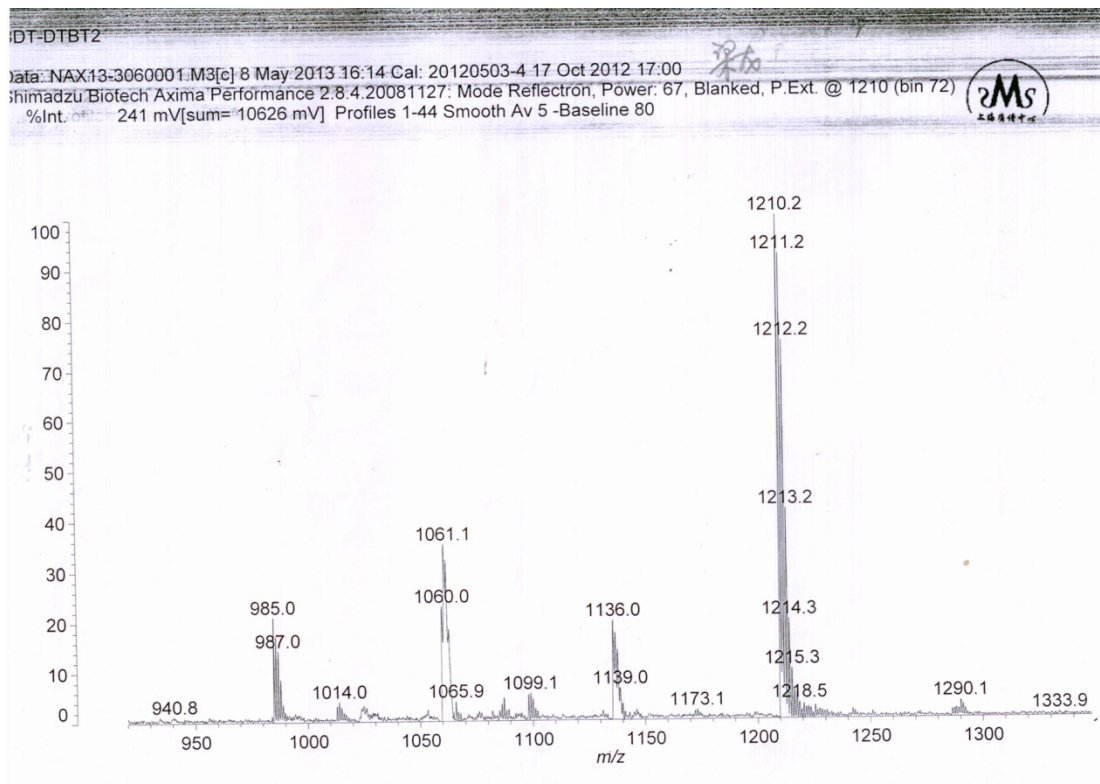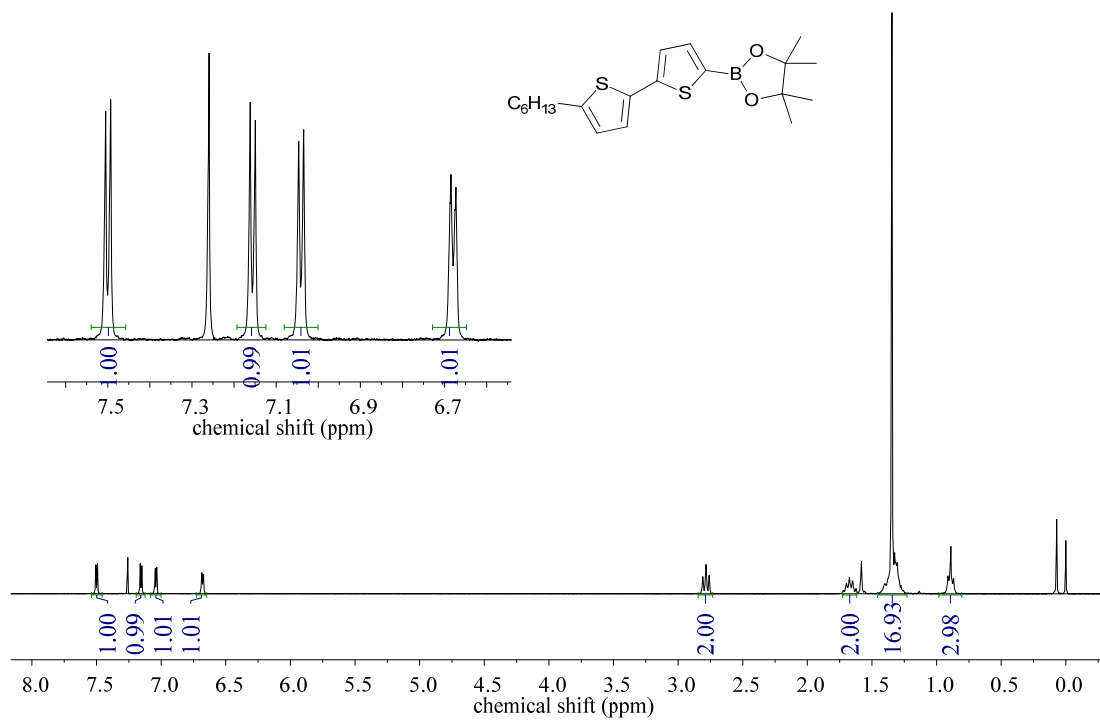

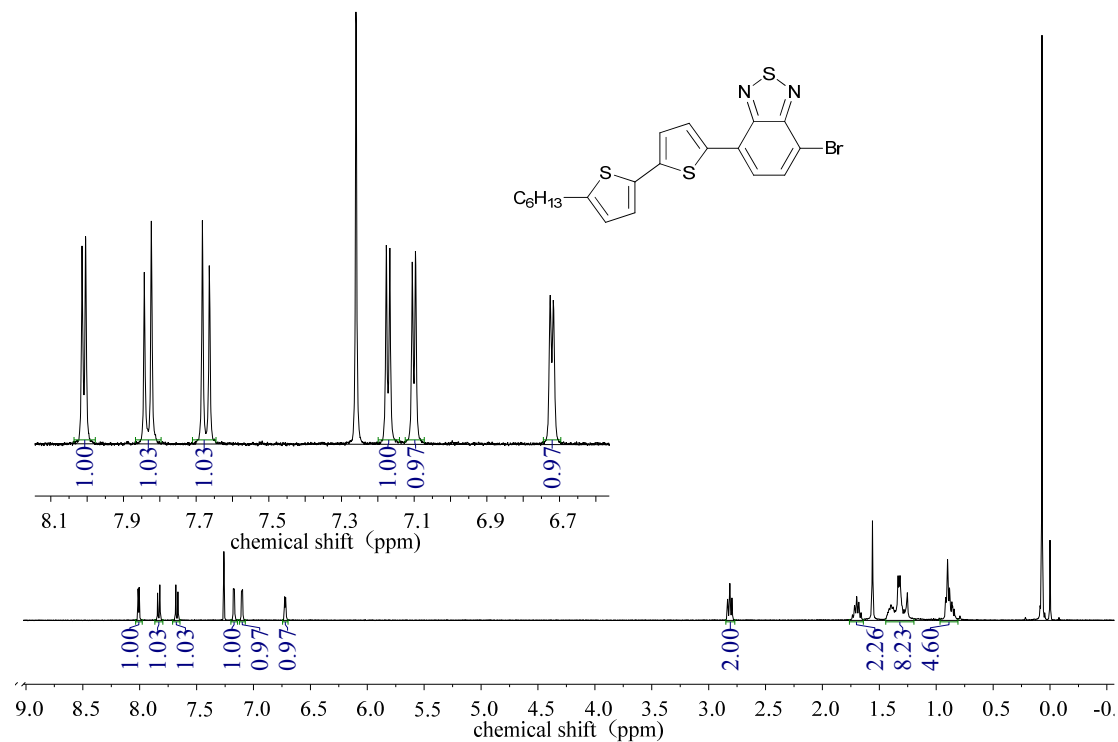

**Fig. S15**  $^1\text{H}$  NMR spectrum of compound **5** in  $\text{CDCl}_3$  at room temperature.

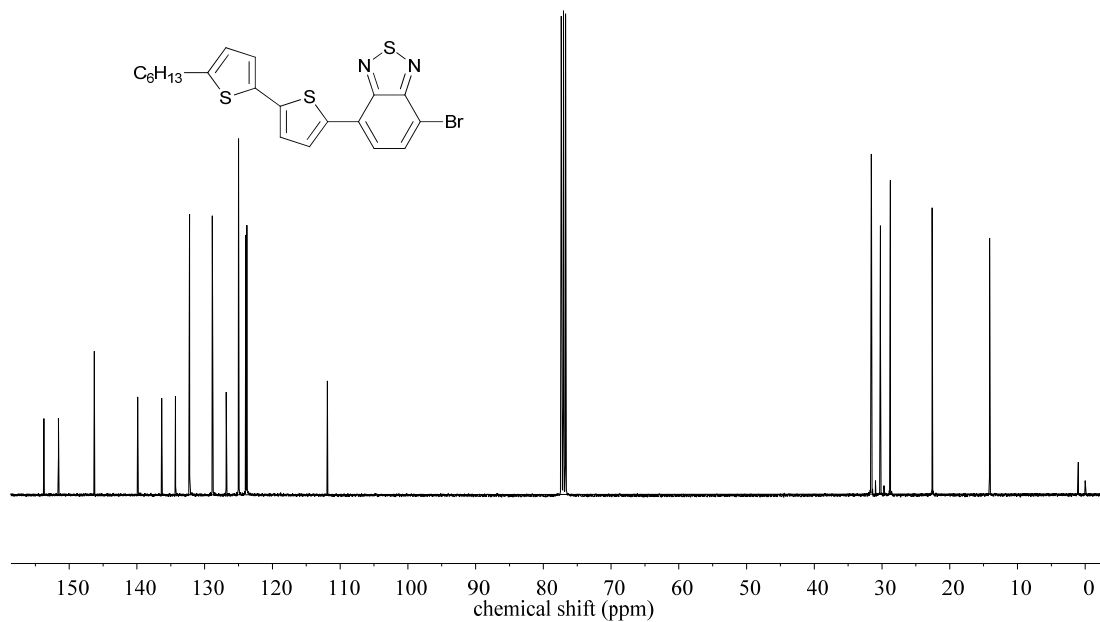

**Fig. S16**  $^{13}\text{C}$  NMR spectrum of compound **5** in  $\text{CDCl}_3$  at room temperature.

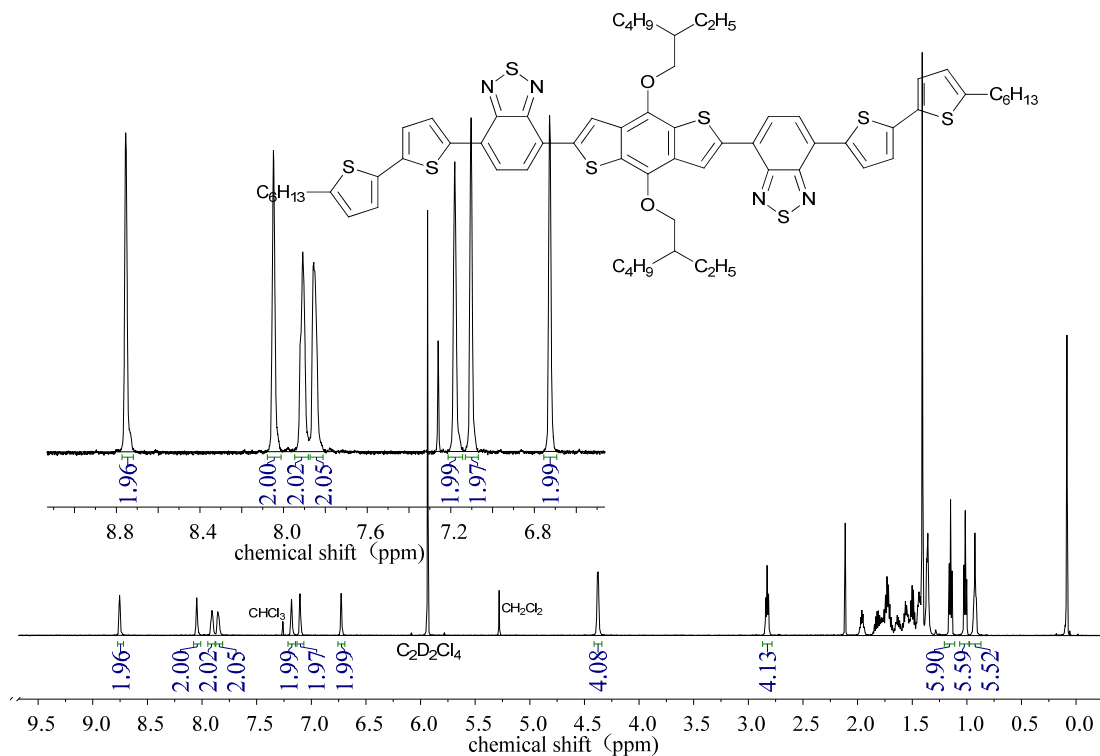

**Fig. S17**  $^1\text{H}$  NMR spectrum of compound  $\text{BDT}(\text{BTTh}_2)_2$  in  $\text{CD}_2\text{Cl}_4$  at  $110\text{ }^\circ\text{C}$ .

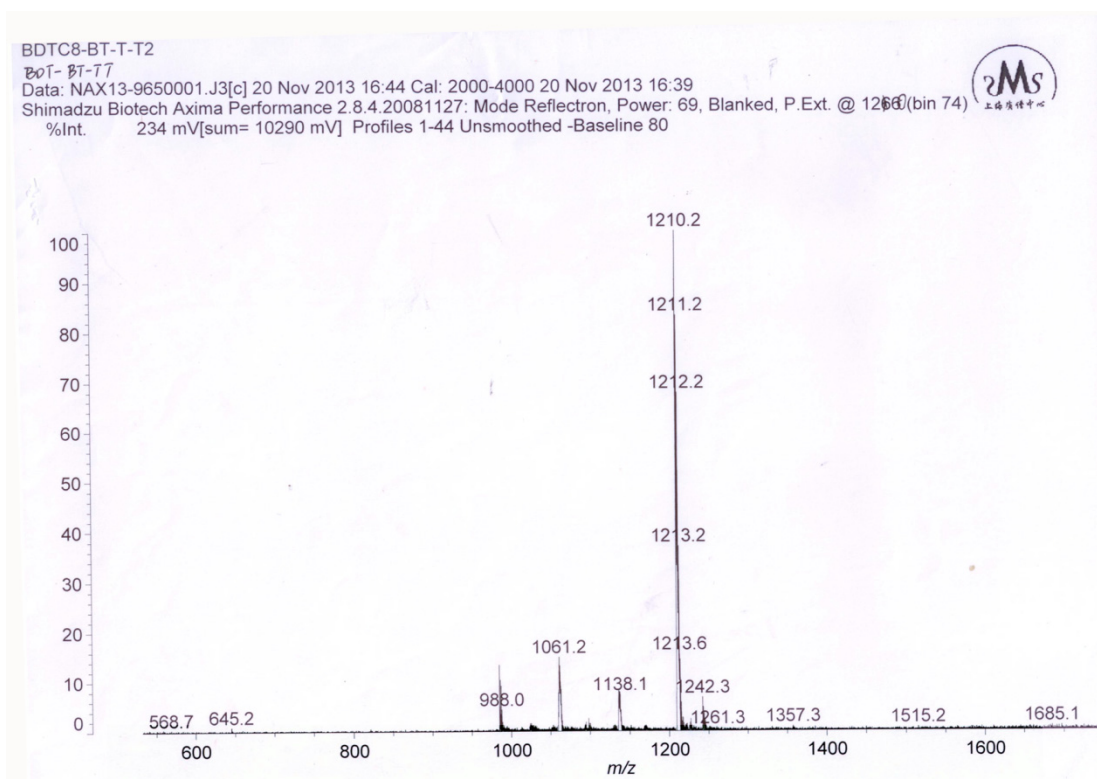

**Fig. S18** MALDI-TOF mass spectrum of compound  $\text{BDT}(\text{BTTh}_2)_2$ .
